# Supplementary material for: Chlorine speciation in complex hydrocarbon matrices using GC-ICP-MS/MS
Source: Royal Society of Chemistry journal article supplement (doi:10.1039/d3ja00066d), 2023-01-01
Supplement: d3ja00066d1.pdf [file d3ja00066d1.pdf]

# Chlorine speciation in complex hydrocarbon matrices using GC-ICP-MS/MS

Vincent Souchon<sup>a</sup>, Marc Maleval<sup>a</sup>, Fabien Chainet<sup>\*a</sup>, Charles-Philippe Lienemann<sup>a</sup>

<sup>a</sup>IFP Energies Nouvelles, Rond-point de l'échangeur de Solaize, BP 3, F-69360 Solaize, France

## Table of Content

### Fig. S

|                                                                                                                                                                                                                                                                                                                                                                                                            |    |
|------------------------------------------------------------------------------------------------------------------------------------------------------------------------------------------------------------------------------------------------------------------------------------------------------------------------------------------------------------------------------------------------------------|----|
| Fig. S 1 Chromatograms of the (a) carbon <sup>13</sup> → <sup>13</sup> C, (b) argon <sup>38</sup> → <sup>39</sup> Ar, (c) chlorine <sup>35</sup> → <sup>37</sup> Cl channels obtained for the injection of the optimization mix solution containing CHCl <sub>3</sub> and 2-chloro-2-methylpropane in n-heptane with CG = 0.1 and OG = 0.16 L min <sup>-1</sup> (optimized conditions). .....              | 3  |
| Fig. S 2 Calibration curves for 13 standard chlorinated compounds in n-heptane for Cl concentrations from 0.02 to 15 mgCl L <sup>-1</sup> per compound. Every calibration standard was injected in three replicates. ....                                                                                                                                                                                  | 4  |
| Fig. S 3. Calibration curves for 13 standard chlorinated compounds in n-heptane for Cl concentrations from 0.02 to 15 mgCl L <sup>-1</sup> per compound. Every calibration standard was injected in three replicates. Zoom on concentrations below 1.5 mgCl L <sup>-1</sup> . ....                                                                                                                         | 5  |
| Fig. S 4. Slopes of 5 independent calibration curves obtained from 5 independently prepared standard solutions (C1, C4, C5, C6 and C7) containing 13 organochlorides in n-heptane. ....                                                                                                                                                                                                                    | 6  |
| Fig. S 5. Calibration line for chlorobenzene in n-heptane on the HP-INNOWax column in the 1-20 mgCl L <sup>-1</sup> range (slope = 4715). ....                                                                                                                                                                                                                                                             | 8  |
| Fig. S 6. (left) <sup>35</sup> → <sup>37</sup> and <sup>13</sup> → <sup>13</sup> chromatograms for the analysis of chlorobenzene in n-heptane (13.5 mgCl L <sup>-1</sup> ) on a DB-1MS column (23.5 m, 0.25 mm, 0.25 μm) run at 340°C in isothermal mode and (right) obtained calibration line between 0.8 and 13.5 mgCl L <sup>-1</sup> (slope = 4486). ....                                              | 9  |
| Fig. S 7. (left) <sup>35</sup> → <sup>37</sup> and <sup>13</sup> → <sup>13</sup> chromatograms for the analysis of a mix of 5 organochlorides in n-heptane (around 15 mgCl L <sup>-1</sup> per compound) on a DB-1MS column (23.5 m, 0.25 mm, 0.25 μm) run at 35°C in isothermal mode and (right) obtained calibration line for chlorobenzene between 0.8 and 18 mgCl L <sup>-1</sup> (slope = 4389). .... | 10 |

### Table S

|                                                                                                                                                                                                         |    |
|---------------------------------------------------------------------------------------------------------------------------------------------------------------------------------------------------------|----|
| Table S1. List of the 13 chlorinated compounds used for calibration procedures with their raw formula, chlorine percentage, boiling points and observed retention times. ....                           | 2  |
| Table S2. Relative response factors versus 1,2-dichloroethane in nC7 for 13 chlorinated standard compounds in optimized GC-ICP-MS/MS conditions in n-heptane and in 4 gasoline samples (G1 to G4). .... | 7  |
| Table S3. Percentage of recovery for 13 chlorinated compounds spiked in 4 gasoline samples for medium and high range concentrations. ....                                                               | 11 |
| Table S4. Quantitative results for chlorine speciation in the reformat sample by GC-ICP-MS/MS. ....                                                                                                     | 12 |

45 **Table S1. List of the 13 chlorinated compounds used for calibration procedures with their raw formula, chlorine**  
 46 **percentage, boiling points and observed retention times.**

| Compound                 | Raw formula                                   | %Cl   | Boiling point (°C) | RT (min) |
|--------------------------|-----------------------------------------------|-------|--------------------|----------|
| 2-chloro-2-methylpropane | C <sub>4</sub> H <sub>9</sub> Cl              | 38.3  | 51                 | 2.64     |
| 1-chloropropane          | C <sub>3</sub> H <sub>7</sub> Cl              | 45.14 | 47                 | 3.05     |
| 1-chlorobutane           | C <sub>4</sub> H <sub>9</sub> Cl              | 38.3  | 78                 | 4.38     |
| Carbon tetrachloride     | CCl <sub>4</sub>                              | 92.19 | 77                 | 5.32     |
| 1-chloro-2-methylbutane  | C <sub>5</sub> H <sub>11</sub> Cl             | 33.26 | 86                 | 5.77     |
| Dichloromethane          | CH <sub>2</sub> Cl <sub>2</sub>               | 83.48 | 40                 | 6.64     |
| 1-chloropentane          | C <sub>5</sub> H <sub>11</sub> Cl             | 33.26 | 108                | 6.86     |
| Trichloroethylene        | C <sub>2</sub> HCl <sub>3</sub>               | 80.95 | 87                 | 8.16     |
| Tetrachloroethylene      | C <sub>2</sub> Cl <sub>4</sub>                | 85.51 | 121                | 8.84     |
| 1,2-dichloroethane       | C <sub>2</sub> H <sub>4</sub> Cl <sub>2</sub> | 71.65 | 83                 | 9.92     |
| 1-chloroheptane          | C <sub>7</sub> H <sub>15</sub> Cl             | 26.33 | 159                | 11.42    |
| Chlorobenzene            | C <sub>6</sub> H <sub>5</sub> Cl              | 31.5  | 132                | 12.88    |
| 1,1,2-trichloroethane    | C <sub>2</sub> H <sub>3</sub> Cl <sub>3</sub> | 79.73 | 114                | 13.59    |

47  
 48  
 49  
 50  
 51  
 52  
 53  
 54  
 55  
 56  
 57  
 58  
 59  
 60  
 61  
 62  
 63  
 64  
 65  
 66  
 67  
 68  
 69  
 70  
 71  
 72  
 73  
 74  
 75  
 76  
 77  
 78  
 79  
 80  
 81  
 82  
 83  
 84  
 85  
 86  
 87

88  
89

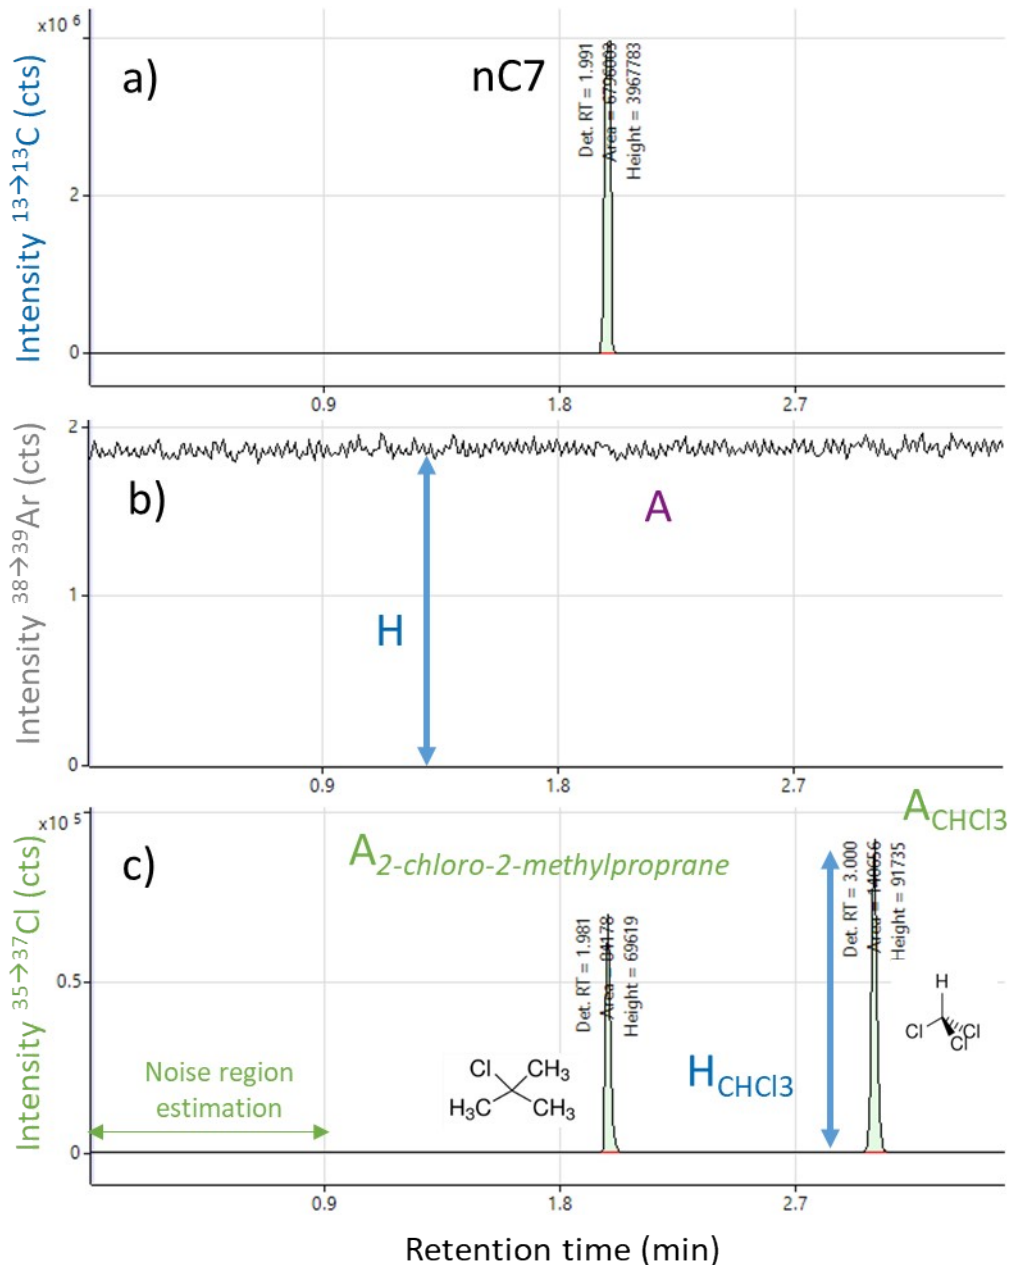

Fig. S 1

90 Chromatograms of the (a) carbon  $^{13}\text{C}$ , (b) argon  $^{39}\text{Ar}$ , (c) chlorine  $^{37}\text{Cl}$  channels obtained for the injection  
91 of the optimization mix solution containing  $\text{CHCl}_3$  and 2-chloro-2-methylpropane in n-heptane with  $\text{CG} = 0.1$  and  
92  $\text{OG} = 0.16 \text{ L min}^{-1}$  (optimized conditions).

93  
94  
95  
96  
97  
98  
99  
100  
101  
102  
103  
104  
105  
106  
107

108  
109  
110  
111  
112  
113  
114  
115  
116  
117  
118  
119  
120  
121  
122  
123  
124  
125  
126  
127  
128  
129  
130  
131  
132  
133  
134  
135  
136  
137  
138  
139  
140  
141  
142  
143  
144  
145  
146  
147  
148  
149  
150  
151  
152  
153  
154  
155  
156  
157  
158  
159  
160  
161  
162

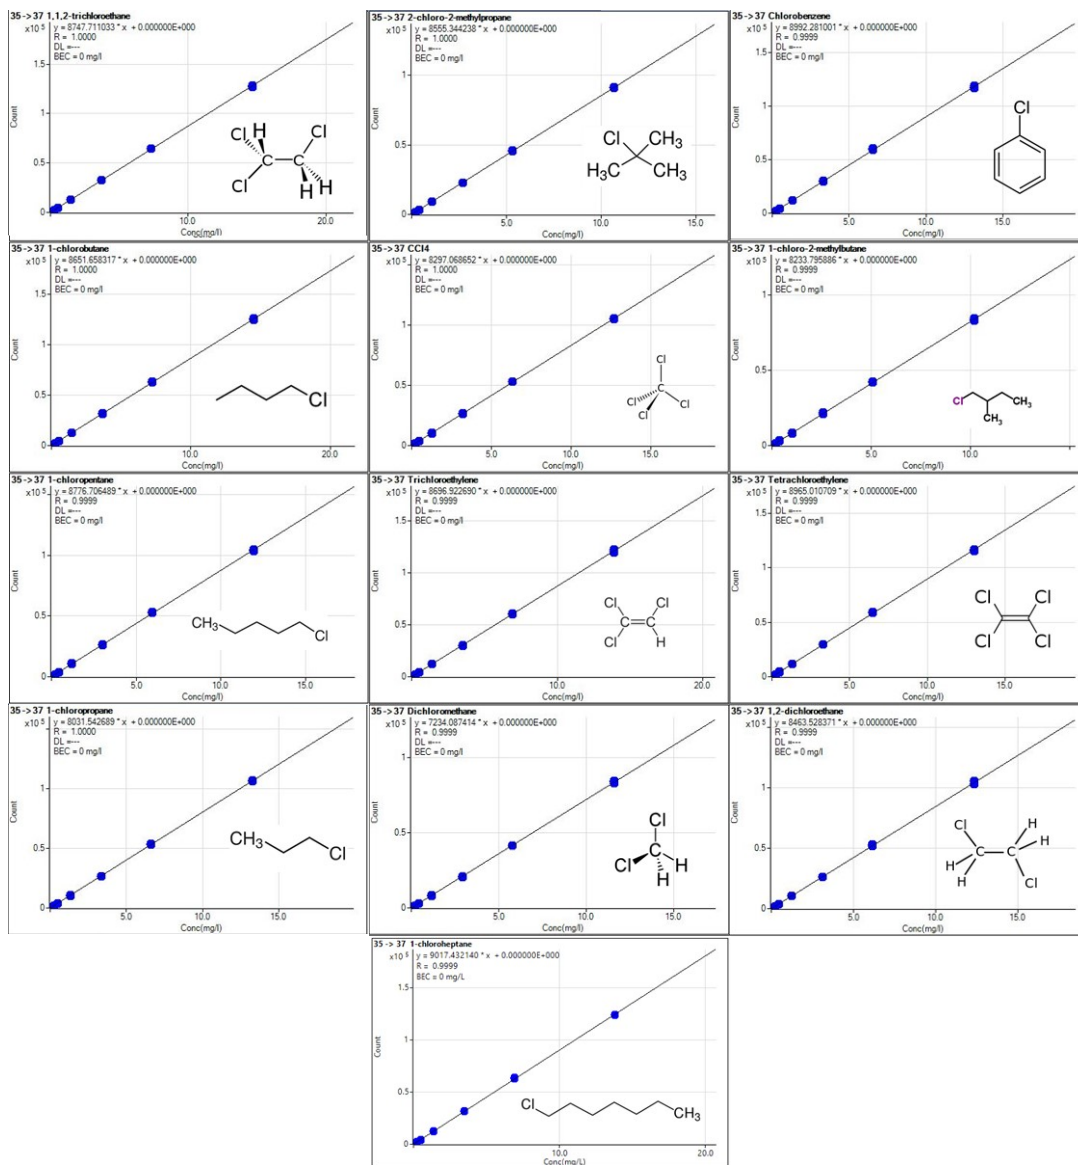

Fig. S 2 Calibration curves for 13 standard chlorinated compounds in n-heptane for Cl concentrations from 0.02 to 15 mgCl L<sup>-1</sup> per compound. Every calibration standard was injected in three replicates.

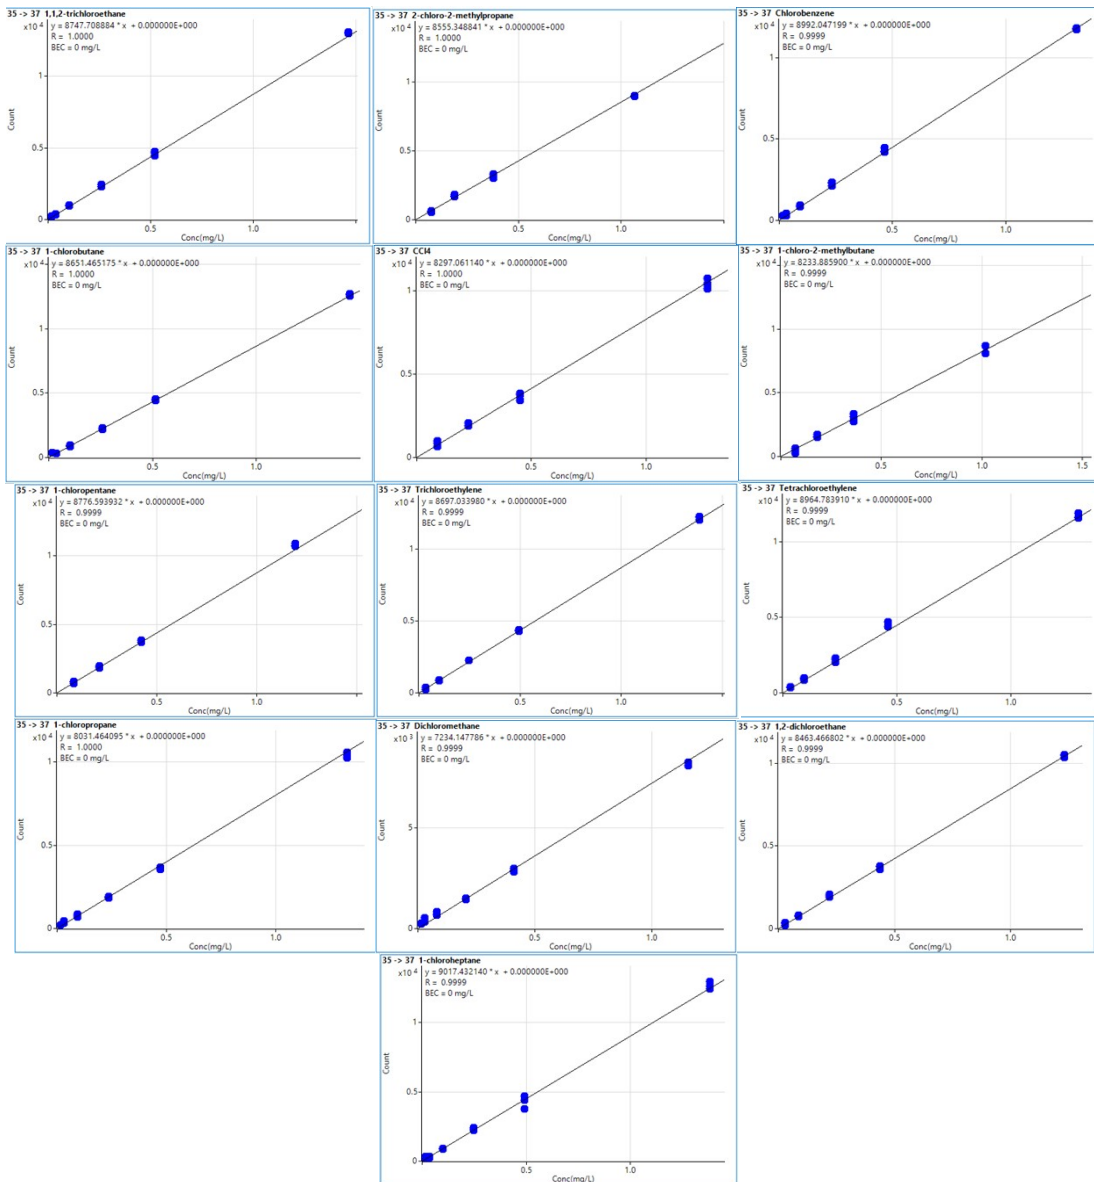

163  
164  
165  
166  
167  
168  
169  
170  
171  
172  
173

**Fig. S 3. Calibration curves for 13 standard chlorinated compounds in n-heptane for Cl concentrations from 0.02 to 15 mgCl L<sup>-1</sup> per compound. Every calibration standard was injected in three replicates. Zoom on concentrations below 1.5 mgCl L<sup>-1</sup>.**

174  
175  
176  
177  
178  
179  
180  
181  
182  
183  
184  
185  
186

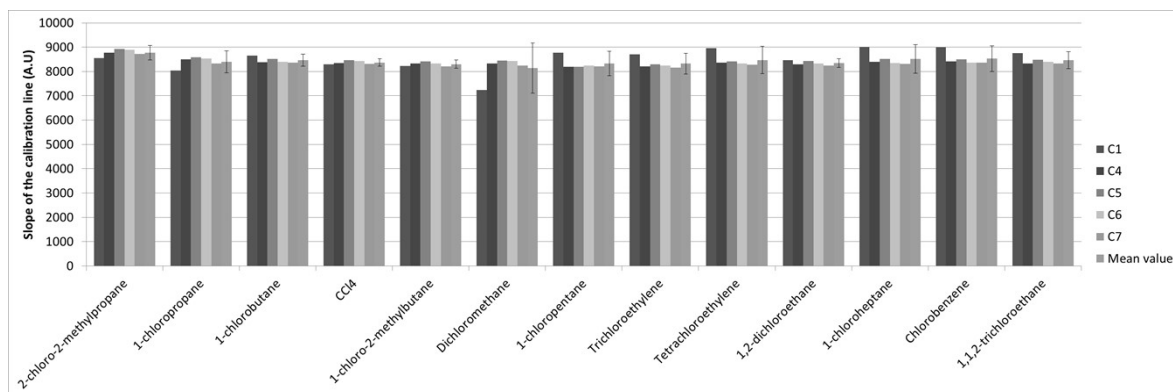

187

188 Fig. S 4. Slopes of 5 independent calibration curves obtained from 5 independently prepared standard solutions

189 (C1, C4, C5, C6 and C7) containing 13 organochlorides in n-heptane.

190

191

192

193 **Table S2. Relative response factors versus 1,2-dichloroethane in nC7 for 13 chlorinated standard compounds in**  
 194 **optimized GC-ICP-MS/MS conditions in n-heptane and in 4 gasoline samples (G1 to G4).**

| Compound                 | n-heptane     | G1   | G2   | G3   | G4   |
|--------------------------|---------------|------|------|------|------|
| 2-chloro-2-methylpropane | 1.05 +/- 0.04 | 0.95 | 0.93 | 0.90 | 0.86 |
| 1-chloropropane          | 1.01 +/- 0.05 | 0.89 | 0.90 | 0.87 | 0.83 |
| 1-chlorobutane           | 1.01 +/- 0.03 | 0.97 | 0.95 | 0.94 | 0.92 |
| Carbon tetrachloride     | 1.00 +/- 0.02 | 0.96 | 0.94 | 0.94 | 0.92 |
| 1-chloro-2-methylbutane  | 0.99 +/- 0.02 | 0.98 | 0.96 | 0.95 | 0.95 |
| Dichloromethane          | 0.97 +/- 0.12 | 0.79 | 0.84 | 0.80 | 0.76 |
| 1-chloropentane          | 1.00 +/- 0.06 | 0.99 | 0.97 | 0.96 | 0.95 |
| Trichloroethylene        | 1.00 +/- 0.05 | 0.97 | 0.94 | 0.95 | 0.93 |
| Tetrachloroethylene      | 1.01 +/- 0.07 | 0.99 | 0.96 | 0.97 | 0.95 |
| 1,2-dichloroethane       | 1.00 +/- 0.02 | 0.94 | 0.94 | 0.91 | 0.90 |
| 1-chloroheptane          | 1.02 +/- 0.07 | 1.04 | 1.01 | 0.99 | 0.98 |
| Chlorobenzene            | 1.02 +/- 0.06 | 1.00 | 0.98 | 0.97 | 0.96 |
| 1,1,2-trichloroethane    | 1.01 +/- 0.04 | 0.97 | 0.96 | 0.94 | 0.93 |

195  
 196  
 197  
 198  
 199  
 200  
 201  
 202  
 203  
 204  
 205  
 206  
 207  
 208  
 209  
 210  
 211  
 212  
 213  
 214  
 215  
 216  
 217  
 218  
 219  
 220  
 221  
 222  
 223  
 224  
 225  
 226  
 227  
 228  
 229  
 230  
 231  
 232  
 233  
 234  
 235  
 236  
 237  
 238

239  
240  
241  
242  
243  
244  
245  
246  
247  
248  
249  
250  
251  
252  
253  
254  
255

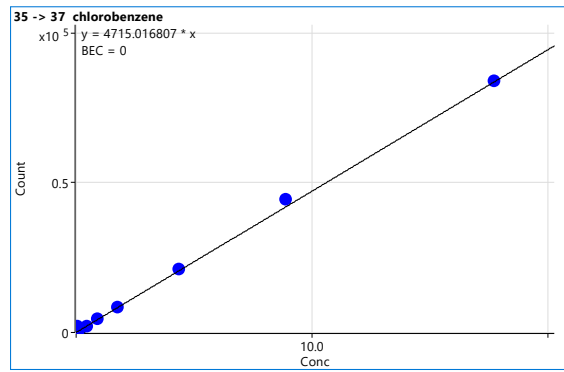

Fig. S 5. Calibration line for chlorobenzene in n-heptane on the HP-INNOWax column in the 1-20 mgCl L<sup>-1</sup> range (slope = 4715).



256  
 257  
 258  
 259  
 260  
 261  
 262  
 263  
 264  
 265  
 266  
 267  
 268  
 269  
 270  
 271  
 272  
 273  
 274  
 275  
 276  
 277  
 278  
 279  
 280  
 281  
 282  
 283  
 284  
 285  
 286

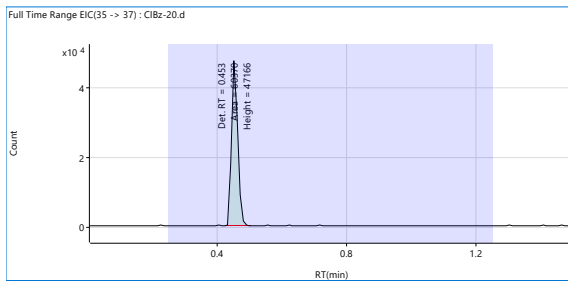

**13→13 chromatograms for the analysis of chlorobenzene in n-heptane (13.5 mgCl L<sup>-1</sup>) on a DB-1MS column (23.5 m, 0.25 mm, 0.25 μm) run at 340°C in isothermal mode and (right) obtained calibration line between 0.8 and 13.5 mgCl L<sup>-1</sup> (slope = 4486).**

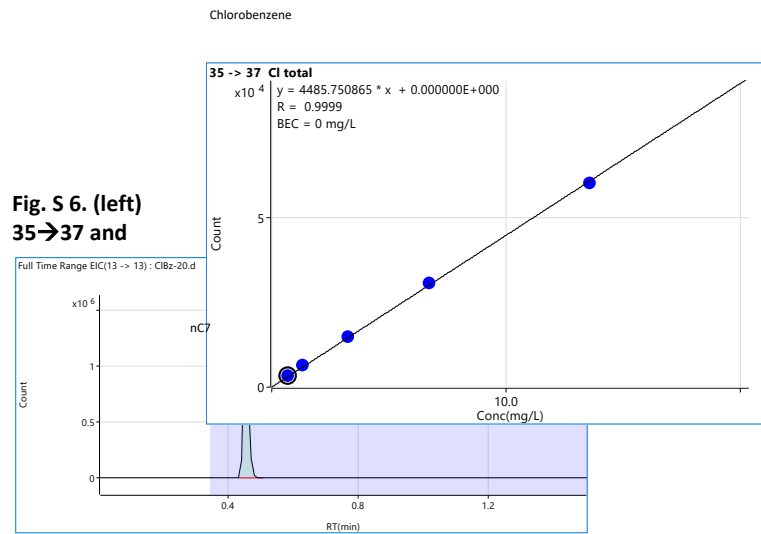

**Fig. S 6. (left) 35→37 and**

287  
288  
289  
290

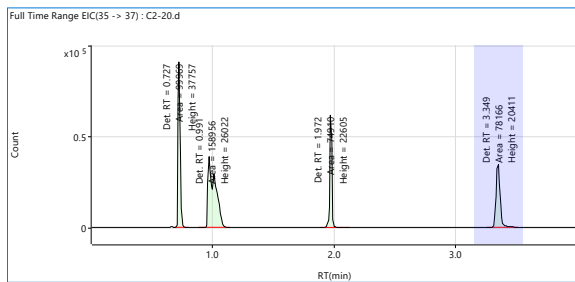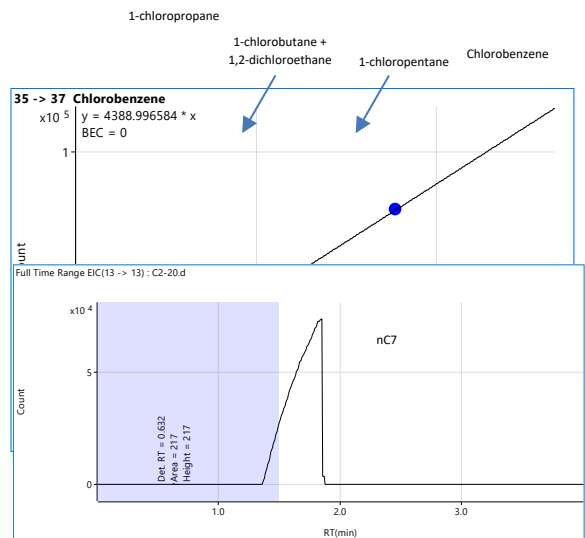

291  
292  
293  
294 **Fig. S 7. (left) 35→37 and 13→13 chromatograms for the**  
295 **analysis of a mix of 5 organochlorides in n-heptane**  
296 **(around 15 mgCl L<sup>-1</sup> per compound) on a DB-1MS**  
297 **column (23.5 m, 0.25 mm, 0.25 μm) run at 35°C in**  
298 **isothermal mode and (right) obtained calibration line for**  
299 **chlorobenzene between 0.8 and 18 mgCl L<sup>-1</sup> (slope =**  
300 **4389).**

301  
302  
303  
304  
305  
306  
307  
308  
309  
310  
311  
312  
313  
314  
315  
316  
317  
318  
319  
320  
321  
322  
323  
324  
325  
326  
327  
328  
329  
330  
331

332 **Table S3. Percentage of recovery for 13 chlorinated compounds spiked in 4 gasoline samples for medium and high**  
 333 **range concentrations.**

| Compound                 | Medium range                 |      |      |      |     | High range                   |      |      |     |     |
|--------------------------|------------------------------|------|------|------|-----|------------------------------|------|------|-----|-----|
|                          | [Cl]<br>mgCl L <sup>-1</sup> | G1   | G2   | G3   | G4  | [Cl]<br>mgCl L <sup>-1</sup> | G1   | G2   | G3  | G4  |
| 2-chloro-2-methylpropane | 1.1                          | 100% | 91%  | 92%  | 84% | 10.9                         | 95%  | 94%  | 90% | 86% |
| 1-chloropropane          | 1.4                          | 91%  | 88%  | 88%  | 83% | 13.5                         | 89%  | 91%  | 87% | 83% |
| 1-chlorobutane           | 1.5                          | 100% | 94%  | 98%  | 92% | 14.8                         | 97%  | 95%  | 94% | 92% |
| Carbon tetrachloride     | 1.3                          | 102% | 95%  | 94%  | 91% | 13.0                         | 96%  | 95%  | 94% | 92% |
| 1-chloro-2-methylbutane  | 1.0                          | 101% | 96%  | 97%  | 95% | 10.4                         | 98%  | 96%  | 95% | 95% |
| Dichloromethane          | 1.2                          | 85%  | 83%  | 80%  | 75% | 11.8                         | 79%  | 84%  | 81% | 76% |
| 1-chloropentane          | 1.2                          | 99%  | 99%  | 99%  | 95% | 12.2                         | 99%  | 97%  | 96% | 96% |
| Trichloroethylene        | 1.4                          | 98%  | 93%  | 97%  | 93% | 14.2                         | 97%  | 94%  | 95% | 93% |
| Tetrachloroethylene      | 1.3                          | 105% | 99%  | 98%  | 95% | 13.3                         | 99%  | 96%  | 97% | 95% |
| 1,2-dichloroethane       | 1.3                          | 98%  | 93%  | 92%  | 89% | 12.6                         | 94%  | 94%  | 91% | 90% |
| 1-chloroheptane          | 1.4                          | 103% | 102% | 101% | 97% | 14.1                         | 104% | 102% | 99% | 98% |
| Chlorobenzene            | 1.3                          | 102% | 99%  | 100% | 97% | 13.4                         | 100% | 98%  | 97% | 96% |
| 1,1,2-trichloroethane    | 1.5                          | 99%  | 96%  | 96%  | 94% | 15.0                         | 97%  | 96%  | 94% | 92% |

334  
 335

336 **Table S4. Quantitative results for chlorine speciation in the reformat sample by GC-ICP-MS/MS.**

| Compound <sup>a</sup>                | 1                | 2?          | 3           | 4?        | 5         | 6?        | 7?        | 8         |
|--------------------------------------|------------------|-------------|-------------|-----------|-----------|-----------|-----------|-----------|
| RT (min)                             | 2.64             | 3.93        | 5.83        | 6.15      | 6.78      | 8.35      | 8.59      | 8.87      |
| [Cl] mg L <sup>-1</sup> <sup>b</sup> | 0.53 ± 0.03      | 0.51 ± 0.03 | 0.26 ± 0.04 | 0.06±0.03 | 0.24±0.03 | 0.12±0.03 | 0.07±0.08 | 0.16±0.14 |
| Distribution (%)                     | 29.3             | 27.8        | 14.7        | 3.7       | 12.3      | 3.8       | 3.0       | 5.3       |
| Total Cl (sum of peaks)              | 1.93 ± 0.16 mg/L |             |             |           |           |           |           |           |

<sup>a</sup> The reference of the identified compounds are (1) 2-chloro-2-methylpropane; (3) 1-chloro-2-methylbutane; (5) 1-chloropentane and (8) Tetrachloroethylene. ? means "unknown chlorinated compound". <sup>b</sup> 3 replicates were taking into account

337  
338  
339  
340
